# Supplementary material for: Associations between lower extremity muscle mass and metabolic parameters related to obesity in Japanese obese patients with type 2 diabetes
Source: PeerJ. 2015 May 5;3:e942. doi: 10.7717/peerj.942 (PMC4499465; doi:10.7717/peerj.942)
Supplement: Supplemental Information 1 [file peerj-03-942-s001.xls]

## Sheet: Sheet1
性別（男:1, 女:2）	年齢	Ex	PA(歩行)	PA(生活)	PA	Ex×体重×1.05	歩数	PAL	NEATスコア歩行	NEATスコア歩行以外	NEATスコア計	総カロリー	基礎代謝	基礎代謝(indirect calorimetry)	身長	体重	BMI	BMI group	腹囲	喫煙（current:1, past:2, never:3）	飲酒(current:1, past:2, never:3)	収縮期血圧	拡張期血圧	ABI(R)	ABI(L)	ABI平均	baPWV®	baPWV(L)	PWV平均	CVR-R	中心血圧	Augmentation Index	HbA1c	血糖値	BNP	T-C	HDL-C	LDL-C	TG	遊離脂肪酸	γリノレン酸	アラキドン酸	EPA	DHA	EPA/AA比	インスリン	Cペプチド	酸化LDL	Lp(a)
1	45	3.24853	249.333	323	572.333	242.519	8273.83	1.56865	25	52	77	2235.33	1425	1527	153.9	71.1	30.0187	1	87	3		117	78	1.16	1.15	1.155	1172	1179	1175.5	4.76	120	77	6.9	97		156	41	84	219	592							2.05	109
2	64	2.14625	117.5	305.5	423	2846.25	5456.25	1.62919	14	38	52	2057.67	1263	881	155.3	72.9	30.2263	1	100.5	3	1	152	93	1.23	1.11	1.17	1802	2019	1910.5	1.04	149	80	5.5	109	10.6	287	80	164	215	1110	72.9	313.6	68.8	151.3	0.22	12.4		144	1
2	75	0.23075	27.5	189.75	217.25	16.6209	1475	1.35624	21	51	72	1554.25	1146	1251	149.6	68.6	30.6521	1	87.5	3		142	73	1.31	1.34	1.325	1922	1908	1915	7.26	151	92	8.7	153	28.5	218	42	148	150	523						4.47	1.6	137
2	51	1.517	79.6667	161.667	241.333	2279.37	2450.67	1.40001	20	45	65	2003.42	1431	1097	162.5	81.7	30.9396	1	103.5	3	1	133	99	1.05	0.98	1.015	1300	1421	1360.5	2.85	143	86	6.8	116	22.9	212	74	109.8	141	624	43.1	196	51.8	120.8	0.26	10.6		134	37
2	39	1.963	100.571	148.286	248.857	150.464	4241.71	1.32349	16	38	54	1769.5	1337	1371	153.5	73	30.9818	1	106	2	3	118	83	1.08	1.01	1.045	1311	1351	1331	1.09	118	68	6.2	101	1.7	212	35	31.8	726	780	101.3	243.4	17.1	138.4	0.07	17.6
2	63	1.38357	90.2857	353.571	443.857	121.014	3890.86	1.51216	22	56	78	2052	1357	652	158	83.3	33.368	1	98	3		122	65	1.16	1.19	1.175	1659	1668	1663.5	1.86	127	84	8.7	105	7.2	162	39	99	120	644							0.61	108	16
2	56	1.94186	154	403.857	557.857	198.186	5008	1.51068	22	60	82	2451.83	1623	1642	165	97.2	35.7025	1	121	3		158	62	1.21	1.25	1.23	2025	2092	2058.5	6.28	150	72	8.7	158	48.1	168	36	97.8	171	605	35.3	151.7	144.9	97.9	0.96		1.21	143	57
2	70								20	47	67			1452	164	94.1	34.9866	1	111.7	3		132	73	1.23	1.1	1.165	1925	2058	1991.5	3.24	126	67	11.4	121	37.9	141	41	77.6	112	488						5.79		84	18
1	27								20	38	58			1493	172	90.4	30.5571	1	109.3	3		131	91	1.15	1.12	1.135	1981	1850	1915.5	5.94	127	57	9.7	123	3.8	164	38	83	215	693							3.76	164	4
1	60								17	30	47			1786	173.6	101.8	33.7791	1	123	1		123	75	0.91	0.92	0.915	1641	1508	1574.5	1.8	125	88	11	130	4.6	120	37	63.8	96	407								83	7
1	39								18	29	47			1377	181.6	99.3	30.1105	1	101.7	3		144	88	1.02	1.02	1.02	1658	1658	1658	0.67	147	86	12.9	113	4.1	152	22	95.6	172	399						14.8	2.88	150	6
2	53								13	47	60			1585	153	74.7	31.9108	1	98.2	1		144	84	1.18	1.14	1.16	1502	1498	1500	1.96	148	81	6.6	97	36.4	169	31	118.4	98	750						7.82	2.64	139	23
2	43								17	53	70			1319	158	89.2	35.7315	1	109.4	3		149	102	1.01	1.02	1.015	1547	1564	1555.5	3.22	156	83	9.8	142	5.3	138	39	67.2	159	421							1.62	229	8
2	50	3.57938	441.625	282.75	724.375	370.197	16597.5	1.6036	16	30	46	2660.38	1659	1047	165.1	98.5	36.1362	2	121.7	3		126	82	1.08	1.1	1.09	1307	1316	1311.5	5.24	139	92	9.4	206	7.6	239	38	154	235	923							3.76	272	6
1	66	0.2772	43.6	242.6	286.2	28.2328	1391.6	1.33443	24	38	62	2275.2	1705	1436	162.5	97	36.7337	2	119	3		122	63	1.39	1.31	1.35	1542	1504	1523	6.19	106	47	6.2	90	47.9	183	31	112.2	199	477						9.77		127	7
1	47	1.827	126.667	455.667	582.333	209.676	2711.83	1.463	16	37	53	2873.33	1964	604	172.3	109.3	36.8171	2	121	3		117	73	0.99	1.02	1.005	1330	1219	1274.5	3.04			10.7	195	21.1	154	46	69.2	194	724							3.9	88	6
2	76	0.0995	10.2	334.3	344.5	123.281	416.1	1.44924	11	42	53	1710.1	1180	1250	139.5	74.7	38.3859	2	117.2	3		108	55	1.13	1.11	1.12	1465	1417	1441	5.94	114	84	6.5	112	22.1	127	40	73	70	845	27.5	143.9	54.2	107.7	0.38	6.56		110	5
2	42	1.43825	165.125	383.625	548.75	139.539	6656.38	1.51912	11	34	45	2363.75	1556	1578	154.5	92.4	38.7093	2	120	1		145	86	0.93	1.16	1.045	1700	1745	1722.5	0.82	136	70	9.1	158	0.2	151	38	87.2	129	724								90	47
2	44	1.004	118.444	492.333	610.778	1895.45	2593.22	1.50655	13	33	46	2708.78	1798	2323	165.3	108	39.5256	2	120.7	3		134	95	1	1.08	1.04	1242	1256	1249	0.89	130	63	5.6	98	9.5	232	54	156	158	556	30.9	234	50.8	172.9	0.22	28.6		146	39
1	32	1.1675	90.5	265.5	356	123.813	2649.88	1.38789	14	39	53	2556.5	1842	1702	158.7	101	40.1021	2	129.7	3		123	67	0.94	0.93	0.935	1371	1423	1397	2.46	120	72	8.4	114	11	154	26	46.2	409	469								170	3
2	40	4.5086	293	455.2	748.2	7583.92	8165.8	1.30431	12	33	45	2089.5	1602	1183	152	96.3	41.6811	2	118	1	3	127	96	0.96	1.03	0.995	1260	1100	1180	7.91	137	83	6.1	92	2.1	172	43	113.6	77	939	46.1	148.7	32.1	65.5	0.22	16.8		147	11
1	45	3.756	335	335.75	670.75	8258.32	5947.5	1.47803	21	52	73	3095	2094	1877	167.2	121.5	43.4614	2	128.8	2				1.33	1.25	1.29	1271	1344	1307.5				5.7	75	4.4	158	37	92	145	599	49.8	169.5	26.6	88.7	0.16	26		105	16
1	41								16	29	45			1968	161.2	113.5	43.6783	2	128.5	1		132	107	1.14	1.14	1.14	2039	2138	2088.5	2.11	138	82	9.7	184	3.2	227	37	156.6	167	1000						12.9		189	88
2	61								14	41	55			1735	155.6	103	42.542	2	128.2	3		117	73	0.9	1.02	0.96	1304	1449	1376.5	5.1	115	66	7.6	102	2.7	140	45	71.2	119	766							3.06	105	11
2	55								20	49	69				162.3	109	41.3799	2	111.7	3		165	58	1.13	1.1	1.115	1371	1243	1307	1.38	143	65	10	190	17	139	39	76	120	940							2.46	64	40
1	34								14	35	49			1836	158.7	109.8	43.5962	2	118.4	1		137	92	1.2	1.22	1.21	1171	1215	1193	2.5	134	61	8	111		173	29	117.2	134	789						13		160	19
[truncated: 17 more columns]

## Sheet: Sheet2
下肢/上肢	BMI
2.70604	38.3859
3.13481	39.5256
2.44872	43.4614
3.26452	30.9396
2.16476	41.6811
3.66557	30.2263
2.50464	38.7093
2.61682	40.1021
3.06706	35.7025
2.5973	33.368
2.68847	36.7337
2.32928	36.8171
2.82086	30.9818
2.47068	36.1362
3.14045	30.6521
2.78559	29.8921
下肢/上肢	ウェスト・ヒップ比
2.78559
3.66557	0.91
3.14045	0.87
3.26452	0.88
2.82086	0.92
2.5973	0.99
3.06706	0.97
2.47068	1.07
2.68847	1.01
2.32928	1.25
2.70604	0.88
2.50464	1.01
3.13481	0.93
2.61682	0.96
2.16476	1.08
2.44872	1.09

## Sheet: Sheet3
下肢/上肢	HDL-C
2.70604	40
3.13481	54
2.44872	37
3.26452	74
2.16476	43
3.66557	80
2.50464	38
2.61682	26
3.06706	36
2.5973	39
2.68847	31
2.32928	46
2.82086	35
2.47068	38
3.14045	42
2.78559	41
下肢/上肢	腹囲
2.78559
3.66557	100.5
3.14045	87.5
3.26452	103.5
2.82086	106
2.5973	98
3.06706	121
2.47068	121.7
2.68847	119
2.32928	121
2.70604	117.2
2.50464	120
3.13481	120.7
2.61682	129.7
2.16476	118
2.44872	128.8

## Sheet: Sheet4
2.78559	2.68847
3.66557	2.32928
3.14045	2.70604
3.26452	2.50464
2.82086	3.13481
2.5973	2.61682
3.06706	2.16476
2.47068	2.44872
2.88	2.57419

## Sheet: Sheet5
0.233896	0.158274
0.153361	0.177938
0.162974	0.157914
0.185802	0.131861
0.170411	0.146104
0.161825	0.170093
0.159979	0.166337
0.164612	0.137799
0.185951	0.172922
0.1778	0.151806
0.226183	0.138058
0.159438	0.198716
0.160314	0.151913
0.177119	0.158441

## Sheet: Sheet6
2.78559	2.47068
3.66557	2.68847
3.14045	2.32928
3.26452	2.70604
2.82086	2.50464
2.5973	3.13481
3.06706	2.61682
2.81636	2.16476
2.87842	2.44872
2.32947	2.42335
2.71584	2.19784
2.68243	2.96712
2.68797	2.7122
2.88091	2.56652
